# Supplementary material for: Cadmium diruthenium(ii,iii) carbonates showing diverse magnetism behavior arising from variety configuration of [Ru2(CO3)4]n3n− layer
Source: Royal Society of Chemistry journal article supplement (doi:10.1039/c3dt51143j), 2013-01-01
Supplement: c3dt51143j.pdf [file c3dt51143j.pdf]

## Electronic Supporting Information (ESI)

# Cadmium Diruthenium(II,III) Carbonates Showing Diverse Magnetism Behavior Arising from Variety Topologies of $[\text{Ru}_2(\text{CO}_3)_4]_n^{3n-}$ Layer

Bin Liu,<sup>a,\*</sup> Yan-Yan Jia,<sup>a</sup> Jin Jin,<sup>a</sup> Xue-Mei Liu,<sup>a</sup> Dan Wang,<sup>a</sup> Gang-Lin Xue,<sup>a</sup>

<sup>a</sup>Key Laboratory of Synthetic and Natural Functional Molecule Chemistry of Ministry of Education, College of Chemistry & Materials Science, Shaanxi Key Laboratory of Physico-Inorganic Chemistry, Northwest University, Xi'an 710069, P. R. China

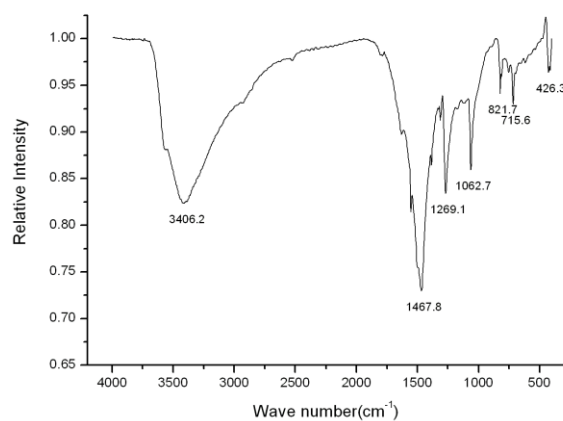

Fig. S1 IR spectra of complex 1

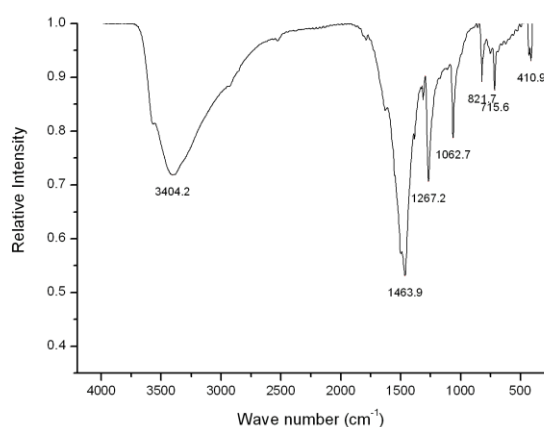

Fig. S2 IR spectra of complex 2.

\* Corresponding author. Tel./fax: +86-029-88302604.

E-mail address: [liubin@nwu.edu.cn](mailto:liubin@nwu.edu.cn) (B. Liu)

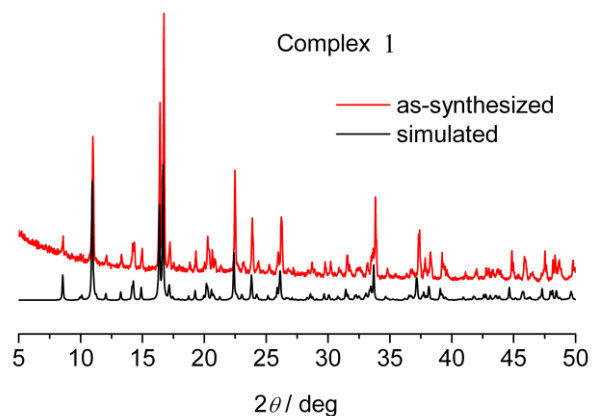

**Fig. S3** Comparison of XRPD patterns of the simulated and as-synthesized of **1**

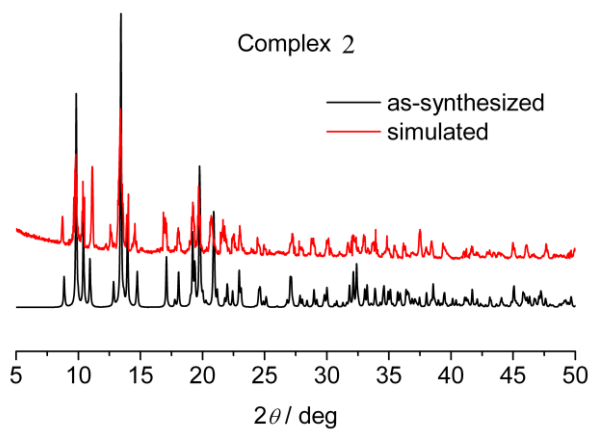

**Fig. S4** Comparison of XRPD patterns of the simulated and as-synthesized of **2**

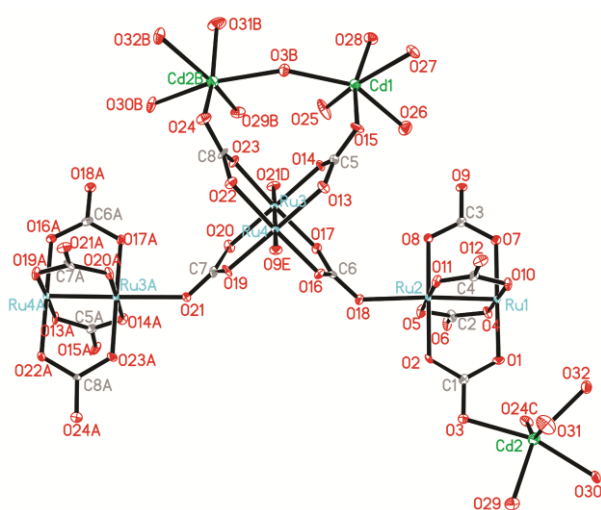

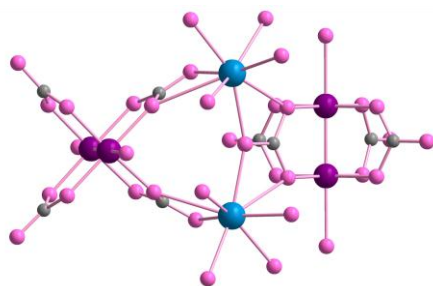

**Fig. S6** The eight coordination environment of Cd<sup>2+</sup> in complex 1.

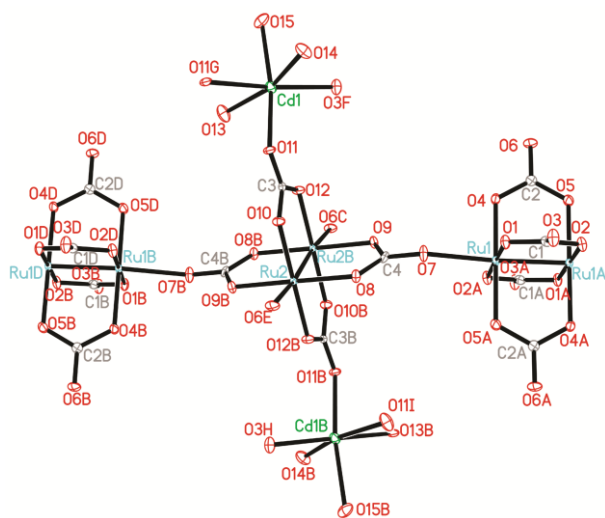

**Fig. S7** ORTEP diagram of **2** with thermal ellipsoids at 30% probability. All H atoms are omitted for clarity.

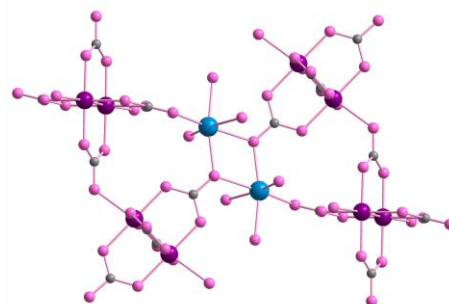

**Fig S8.** The six coordination environment of Cd<sup>2+</sup> in complex 2.

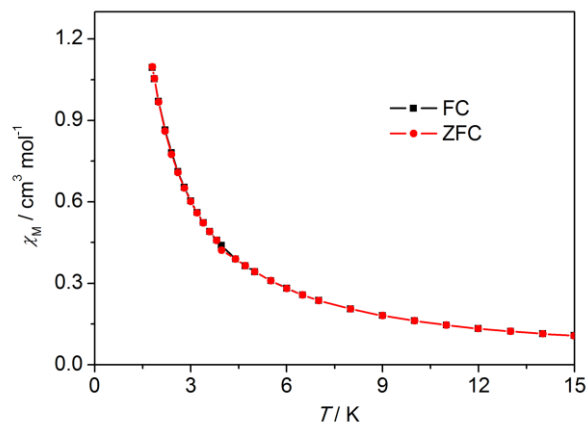

**Fig. S9** The FC and ZFC plots of complex **1** measured at 20 Oe.

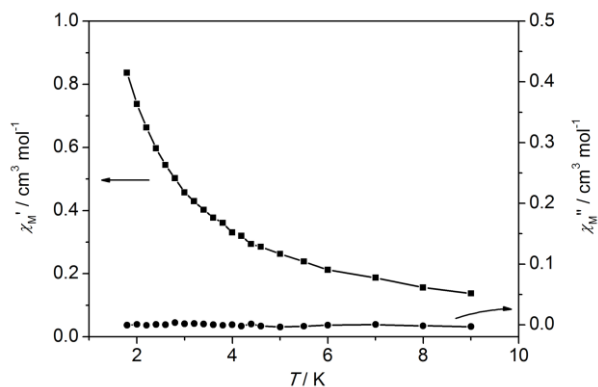

**Fig. S10** The ac susceptibilities at 10 Hz of complex **1**.

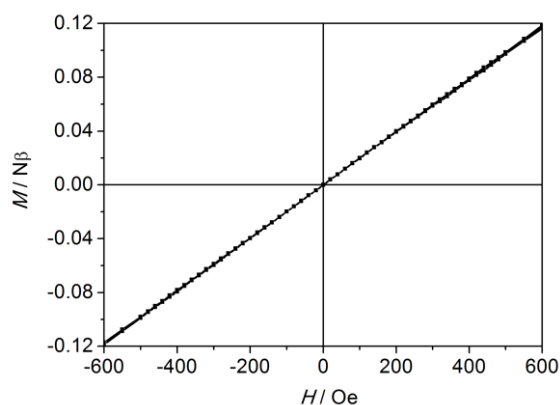

**Fig. S11** Magnetization versus applied magnetic field at 2.0 K of complex **1**.

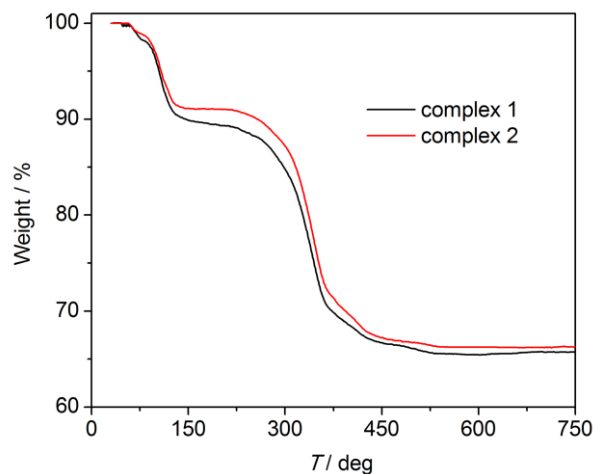

**Fig. S12** TG plots of complexes **1** and **2**.

For complexes **1** and **2**, weight loss steps (10.06% for **1** and 8.97% for **2**, respectively) in the temperature range of 30-150 °C correspond to the release of 4.0 lattice water molecules (10.01%) for **1** and 3.5 lattice water molecules (8.87%) for **2**. The weight loss occurs at the range of 150-500 °C, corresponding to the elimination of three coordination water molecules accompanying with the whole architecture decomposition processes to leave a residue of RuO<sub>2</sub>/CdO/K<sub>2</sub>O mixture.

**Table S1.** Selected bond lengths [Å] and angles (deg) for **1**

|             |            |             |            |          |          |
|-------------|------------|-------------|------------|----------|----------|
| Ru1-Ru2     | 2.2608(11) | Ru3-Ru4     | 2.2581(11) | Cd1-O26  | 2.299(8) |
| Ru1-O1      | 2.035(7)   | Ru3-O14     | 2.040(7)   | Cd1-O27  | 2.361(8) |
| Ru1-O4      | 2.012(7)   | Ru3-O17     | 2.020(7)   | Cd1-O28  | 2.357(7) |
| Ru1-O7      | 2.027(8)   | Ru3-O20     | 2.013(7)   | Cd1-O2C  | 2.694(8) |
| Ru1-O10     | 2.043(7)   | Ru3-O23     | 2.018(7)   | Cd1-O3C  | 2.356(7) |
| Ru1-O12H    | 2.276(7)   | Ru3-O21G    | 2.277(7)   | Cd2-O29  | 2.332(8) |
| Ru2-O2      | 2.043(8)   | Ru4-O13     | 2.042(7)   | Cd2-O30  | 2.333(7) |
| Ru2-O5      | 2.028(8)   | Ru4-O16     | 2.029(7)   | Cd2-O31  | 2.340(9) |
| Ru2-O8      | 2.030(7)   | Ru4-O19     | 2.024(7)   | Cd2-O32  | 2.389(8) |
| Ru2-O11     | 2.052(7)   | Ru4-O22     | 2.048(8)   | Cd2-O3F  | 2.384(7) |
| Ru2-O18     | 2.286(7)   | Ru4-O9A     | 2.256(7)   | Cd2-O23J | 2.686(7) |
| Cd1-O15     | 2.314(7)   | Cd1-O25     | 2.377(9)   | Cd2-O24J | 2.320(7) |
| Ru1-O1-C1   | 118.6(6)   | Ru4-O13-C5  | 118.8(6)   |          |          |
| Ru2-O2-C1   | 119.0(6)   | Ru3-O14-C5  | 119.8(6)   |          |          |
| Ru1-O4-C2   | 121.0(6)   | Ru4-O16-C6  | 120.3(6)   |          |          |
| Ru2-O5-C2   | 120.9(6)   | Ru3-O17-C6  | 119.1(6)   |          |          |
| Ru1-O7-C3   | 119.0(7)   | Ru4-O19-C7  | 120.3(6)   |          |          |
| Ru2-O8-C3   | 119.4(6)   | Ru3-O20-C7  | 121.0(6)   |          |          |
| Ru1-O10-C4  | 118.1(6)   | Ru4-O22-C8  | 117.9(6)   |          |          |
| Ru2-O11-C4  | 119.5(7)   | Ru3-O23-C8  | 121.2(6)   |          |          |
| Ru1F-O12-C4 | 135.0(6)   | Ru4B-O9-C3  | 129.4(6)   |          |          |
| Ru2-O18-C6  | 135.5(6)   | Ru3E-O21-C7 | 135.6(6)   |          |          |

Symmetry transformations used to generate equivalent atoms: A:  $-1+x, y, z$ ; B:  $1+x, y, z$ ; C:  $1/2-x, 1-y, -1/2+z$ ; D:  $1/2-x, 1-y, 1/2+z$ ; E:  $-1/2+x, 1/2-y, 1-z$ ; F:  $-1/2+x, 3/2-y, 1-z$ ; G:  $1/2+x, 1/2-y, 1-z$ ; H:  $1/2+x, 3/2-y, 1-z$ ; I:  $-x, -1/2+y, 1/2-z$ ; J:  $-x, 1/2+y, 1/2-z$ .

**Table S2.** Selected bond lengths [Å] and angles (deg) for **2**

|            |           |             |           |          |          |
|------------|-----------|-------------|-----------|----------|----------|
| Ru1-Ru1H   | 2.2531(8) | Ru2-Ru2J    | 2.2577(7) | Cd1-O11  | 2.270(4) |
| Ru1-O1     | 2.020(4)  | Ru2-O8      | 2.009(4)  | Cd1-O13  | 2.287(5) |
| Ru1-O4     | 2.009(4)  | Ru2-O10     | 2.020(4)  | Cd1-O14  | 2.349(5) |
| Ru1-O7     | 2.269(4)  | Ru2-O6D     | 2.262(3)  | Cd1-O15  | 2.301(5) |
| Ru1-O2H    | 2.028(4)  | Ru2-O9J     | 2.038(4)  | Cd1-O3E  | 2.243(4) |
| Ru1-O5H    | 2.027(4)  | Ru2-O12J    | 2.025(4)  | Cd1-O11K | 2.410(3) |
| Ru1-O1-C1  | 120.1(3)  | Ru2-O8-C4   | 121.0(4)  |          |          |
| Ru1H-O2-C1 | 117.9(3)  | Ru2J-O9-C4  | 117.4(3)  |          |          |
| Ru1-O4-C2  | 120.7(4)  | Ru2-O10-C3  | 121.0(3)  |          |          |
| Ru1H-O5-C2 | 119.0(3)  | Ru2J-O12-C3 | 118.5(3)  |          |          |
| Ru1-O7-C4  | 147.3(3)  | Ru2C-O6-C2  | 126.8(3)  |          |          |

Symmetry transformations used to generate equivalent atoms: A:  $-1+x, y, -1+z$ ; B:  $-1+x, y, z$ ; C:  $x, y, -1+z$ ; D:  $x, y, 1+z$ ; E:  $1+x, y, z$ ; F:  $1+x, y, 1+z$ ; G:  $-1-x, 1-y, -z$ ; H:  $-1-x, 1-y, 1-z$ ; I:  $-x, 1-y, 1-z$ ; J:  $-x, 1-y, 2-z$ ; K:

1-x, -y, 2-z.
